# Supplementary material for: Prevalence and determinants of maternal healthcare utilisation among young women in sub-Saharan Africa: cross-sectional analyses of demographic and health survey data
Source: PubMed Central journal article supplement (PMC8981812; doi:10.1186/s12889-022-13037-8), 2022-04-05
Supplement: 12889_2022_13037_MOESM1_ESM.pdf [file 12889_2022_13037_MOESM1_ESM.pdf]

**Appendix 1. Description of sample**

| <b>Countries</b>     | <b>Year of survey</b>   | <b>Weighted N</b> | <b>Weighted %</b> |
|----------------------|-------------------------|-------------------|-------------------|
| Angola               | 2015-16                 | 1,831             | 4.2               |
| Benin                | 2017-18                 | 2,052             | 4.7               |
| Burkina Faso         | 2010                    | 2,805             | 6.4               |
| Burundi              | 2016-17                 | 1,550             | 3.5               |
| Cameroon             | 2018                    | 1,428             | 3.3               |
| Chad                 | <a href="#">2014-15</a> | 980               | 2.2               |
| Comoros              | 2012                    | 450               | 1.0               |
| Congo DR             | 2013-14                 | 2,451             | 5.6               |
| Congo                | 2011-12                 | 1,228             | 2.8               |
| Cote D'Ivoire        | <a href="#">2011-12</a> | 1,069             | 2.4               |
| Ethiopia             | 2016                    | 1,651             | 3.8               |
| Gabon                | <a href="#">2012</a>    | 590               | 1.4               |
| Gambia               | 2013                    | 471               | 1.1               |
| Ghana                | <a href="#">2014</a>    | 554               | 1.3               |
| Guinea               | <a href="#">2018</a>    | 1,373             | 3.1               |
| Kenya                | 2014                    | 1,416             | 3.2               |
| Lesotho              | 2014                    | 721               | 1.7               |
| Liberia              | 2013                    | 922               | 2.1               |
| Malawi               | <a href="#">2015-16</a> | 3,961             | 9.1               |
| Mali                 | 2018                    | 1,807             | 4.1               |
| Namibia              | 2013                    | 322               | 0.7               |
| Nigeria              | 2018                    | 4,900             | 11.2              |
| Senegal              | 2010-11                 | 1,578             | 3.6               |
| Sierra Leone         | 2019                    | 1,404             | 3.2               |
| Togo                 | 2013-14                 | 907               | 2.1               |
| Uganda               | 2014-15                 | 2,614             | 6.0               |
| Zambia               | 2018                    | 1,600             | 3.7               |
| Zimbabwe             | 2015                    | 1,151             | 2.6               |
| <b>All countries</b> |                         | <b>43,786</b>     | <b>100.0</b>      |
